# Supplementary material for: Corrigendum to: Ganoderic acid D prevents oxidative stress‐induced senescence by targeting 14‐3‐3ε to activate CaM/CaMKII/NRF2 signaling pathway in mesenchymal stem cells
Source: PubMed Central journal article supplement (PMC9741499; doi:10.1111/acel.13732), 2022-10-19
Supplement: ACEL-21-e13732-s001.pdf [file ACEL-21-e13732-s001.pdf]

## Supplementary Figures and Legends

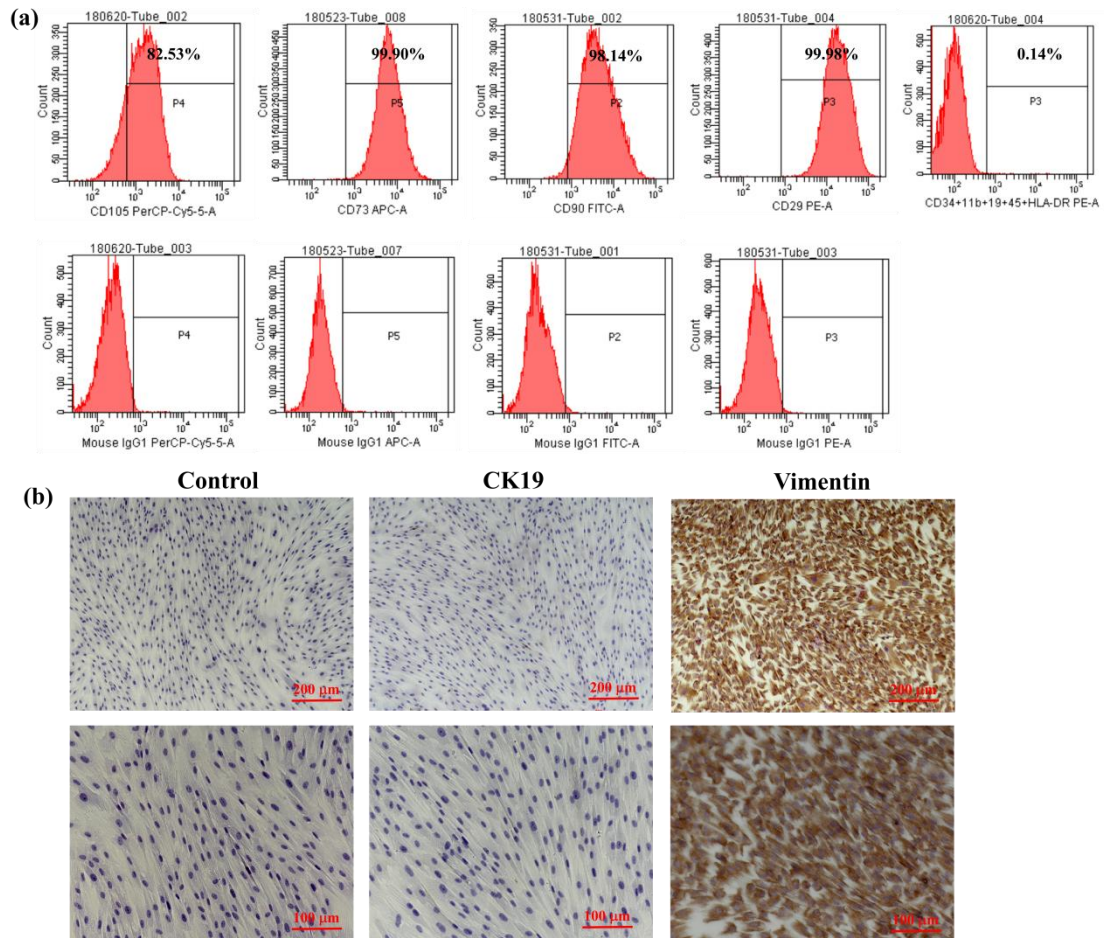

**Supplementary Figure 1. Identification of hAMSCs.** (a) The expression of molecular markers on the surface of hAMSCs was detected using flow cytometry. (b) Immunocytochemical staining of hAMSCs. Scale bar: 100  $\mu\text{m}$ , 200  $\mu\text{m}$ .

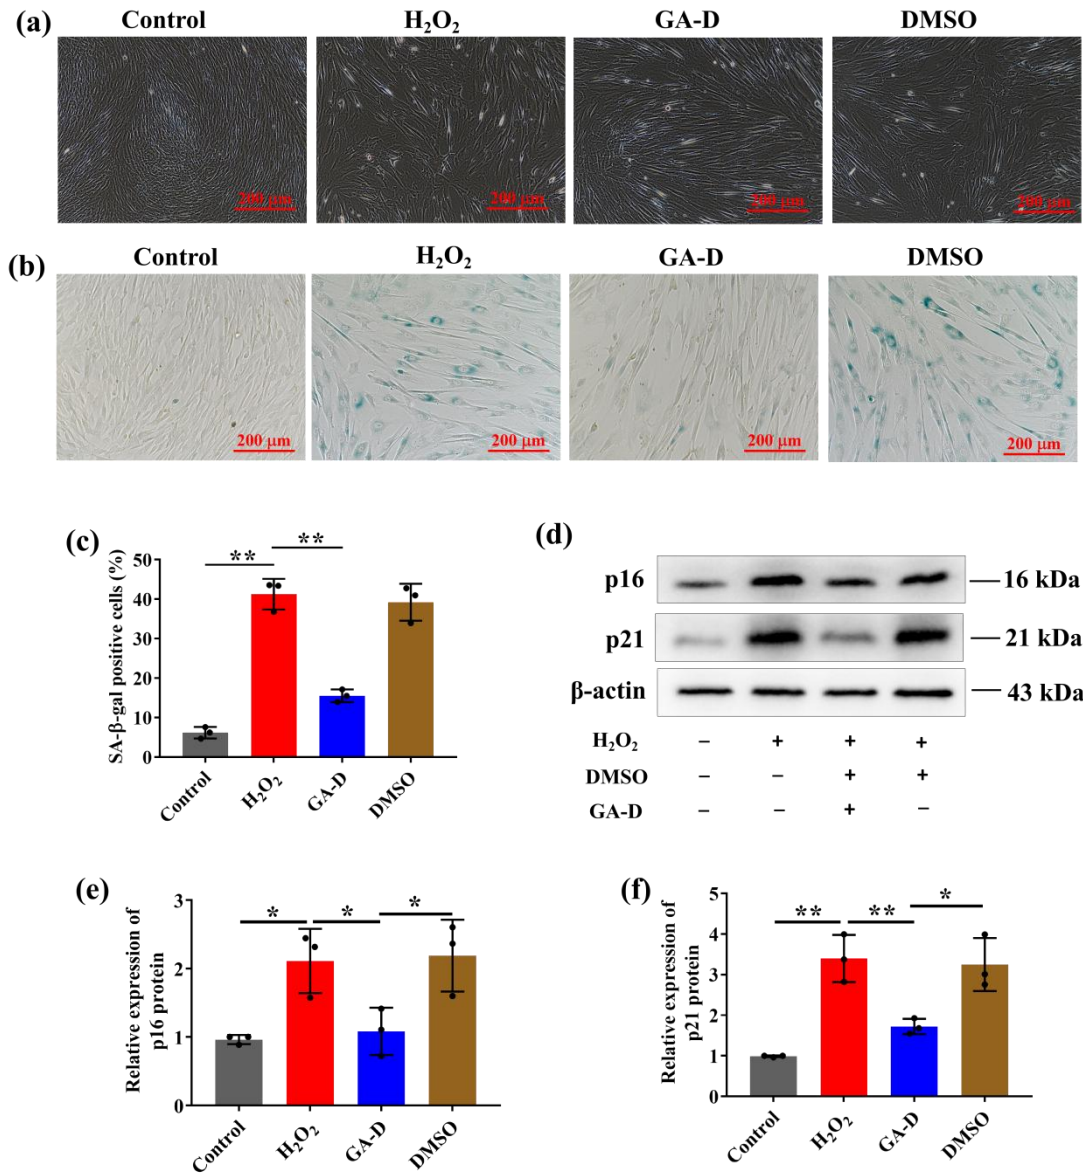

**Supplementary Figure 2. The protect effect of GA-D on H<sub>2</sub>O<sub>2</sub>-induced premature hAMSCs senescence.** (a) Effect of GA-D on the morphology of H<sub>2</sub>O<sub>2</sub>-induced senescent hAMSCs. Scale bar: 200 μm. (b and c) β-galactosidase production and percentage of SA-β-gal-positive cells after GA-D pretreatment. Scale bar: 200 μm. n = 3. (d) Changes in p16<sup>INK4a</sup> and p21 expression in hAMSCs. (e and f) Relative expression of p16<sup>INK4a</sup> and p21. n = 3. Control; control group; H<sub>2</sub>O<sub>2</sub>, senescent group; GA-D, GA-D treatment group; DMSO, DMSO solvent group;  $\bar{x} \pm sd$ , mean ± standard deviation. \**P* < 0.05, \*\**P* < 0.01.

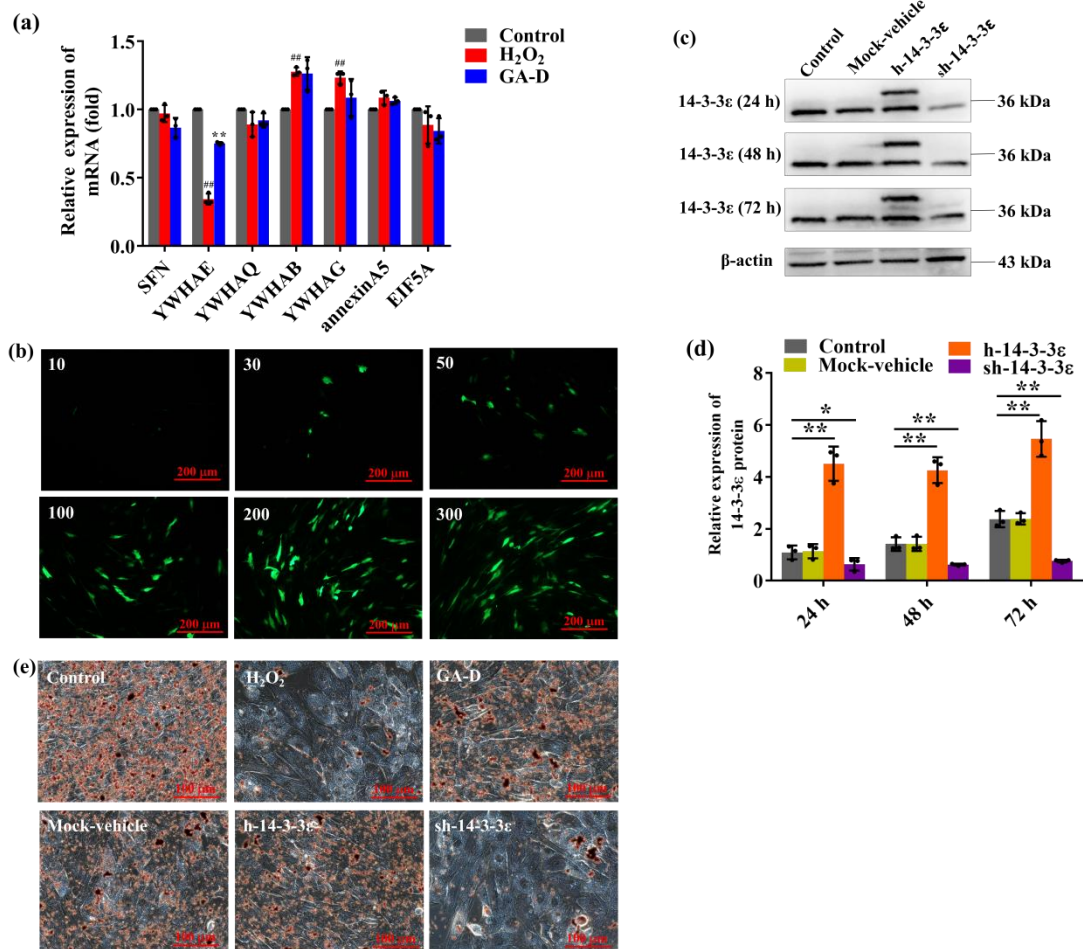

**Supplementary Figure 3. The GA-D target *YWHAE* knockdown and overexpression in H<sub>2</sub>O<sub>2</sub>-induced senescent hAMSCs.** (a) Possible target genes associated with GA-D treatment H<sub>2</sub>O<sub>2</sub>-induced senescent hAMSCs. (b) The multiplicity of infection (MOI) after the viral infection of hAMSCs was set to 10, 30, 50, 100, 200 and 300, respectively. Scale bar: 200 μm. (c and d) the expression of 14-3-3ε protein after overexpression and knockdown of *YWHAE*. Control, control group; Mock-vehicle, empty carrier; h-14-3-3ε, *YWHAE* overexpression; sh-14-3-3ε, *YWHAE* knockdown (e) Oil red O stain staining of hAMSCs. Control, control group; H<sub>2</sub>O<sub>2</sub>, senescent group; GA-D, GA-D treatment group; Mock-vehicle, GA-D treatment group plus empty carrier; h-14-3-3ε, GA-D treatment group plus *YWHAE* overexpression; sh-14-3-3ε, GA-D treatment group plus *YWHAE* knockdown; n = 3.  $\bar{x} \pm sd$ , mean  $\pm$  standard deviation. \**P* < 0.05, \*\**P* < 0.01.

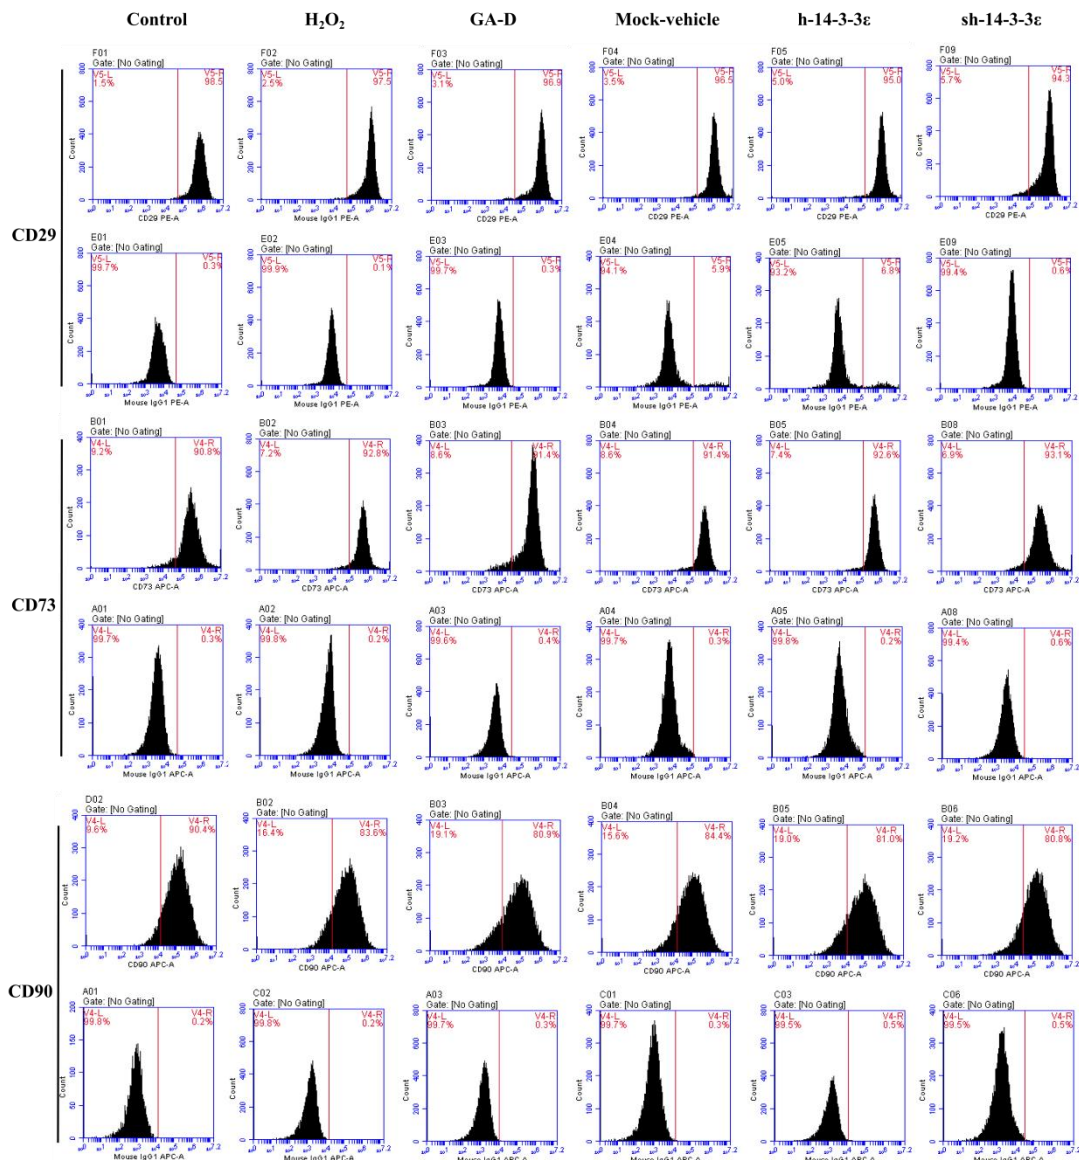

**Supplementary Figure 4.** The expression of molecular markers on the surface of hAMSCs was detected using flow cytometry after the GA-D target *YWHAE* knockdown and overexpression. Control, control group; H<sub>2</sub>O<sub>2</sub>, senescent group; GA-D, GA-D treatment group; Mock-vehicle, GA-D treatment group plus empty carrier; h-14-3-3ε, GA-D treatment group plus *YWHAE* overexpression; sh-14-3-3ε, GA-D treatment group plus *YWHAE* knockdown.

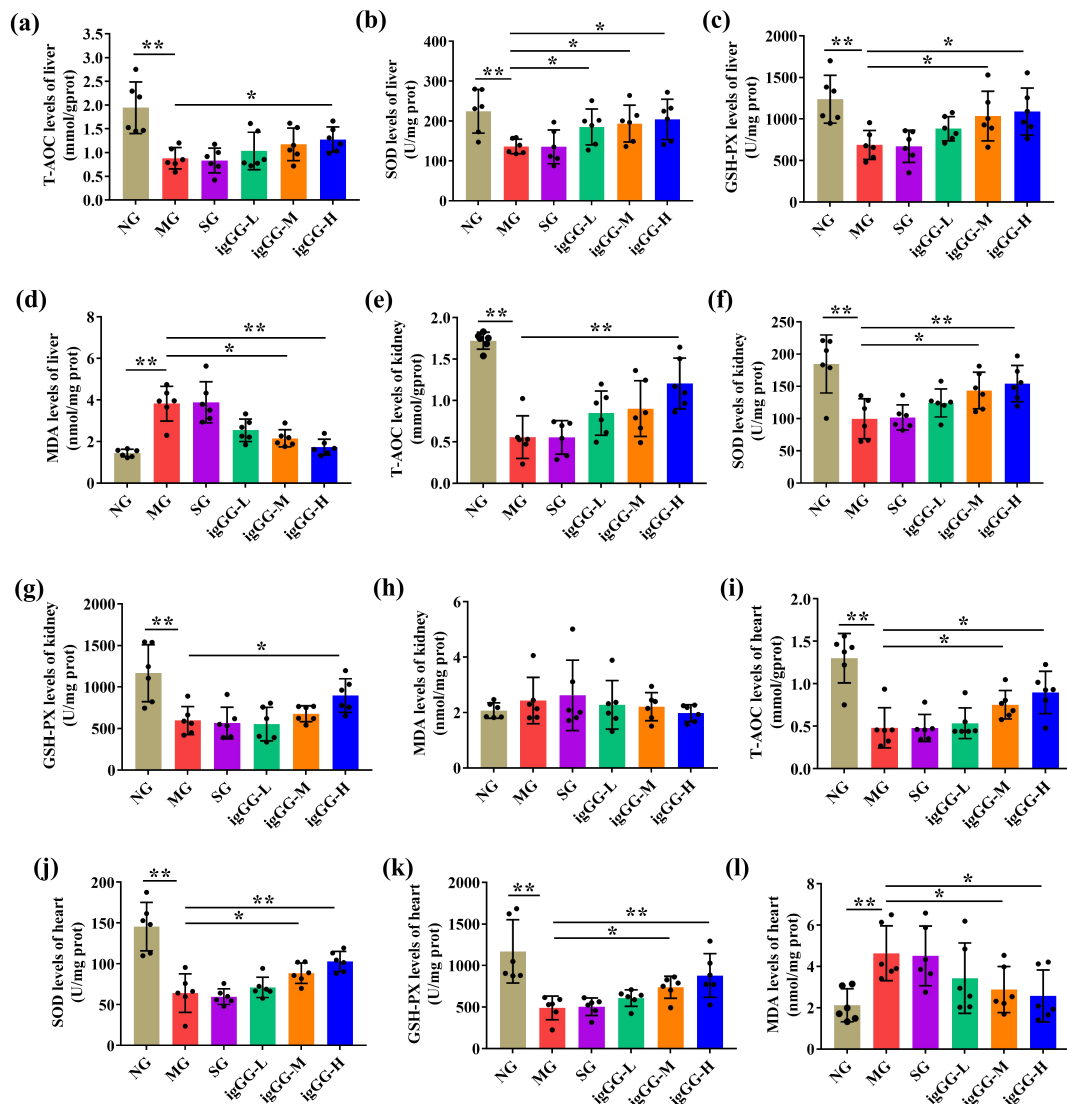

**Supplementary Figure 5. GA-D enhanced the defense against oxidative stress in the liver, kidneys, and heart in *D-gal*-caused aging mice.** (a–d) Activity of T-AOC, SOD, GSH-Px and MDA in the liver of mice upon different treatments. (e–h) Activity of T-AOC, SOD, GSH-Px, and MDA in the kidneys. (i–l) Activity of T-AOC, SOD, GSH-Px, and MDA in the heart. n = 6. T-AOC, total antioxidant capacity; SOD, superoxide dismutase; GSH-Px, glutathione peroxidase; MDA, malondialdehyde; AGEs, advanced glycation end products; RAGEs, receptor of advanced glycation end-products; NG, normal group; MG, model group (*D-gal*-caused aging mice); SG, solvent group (*D-gal*-caused aging mice treated with 0.1% DMSO via intragastric administration); igGG-L, *in vivo* low-dose GA-D treatment group; igGG-M, *in vivo* medium-dose GA-D treatment group; igGG-H, *in vivo* high-dose GA-D treatment group.  $\bar{x} \pm sd$ , mean  $\pm$  standard deviation. \* $P < 0.05$ , \*\* $P < 0.01$ .

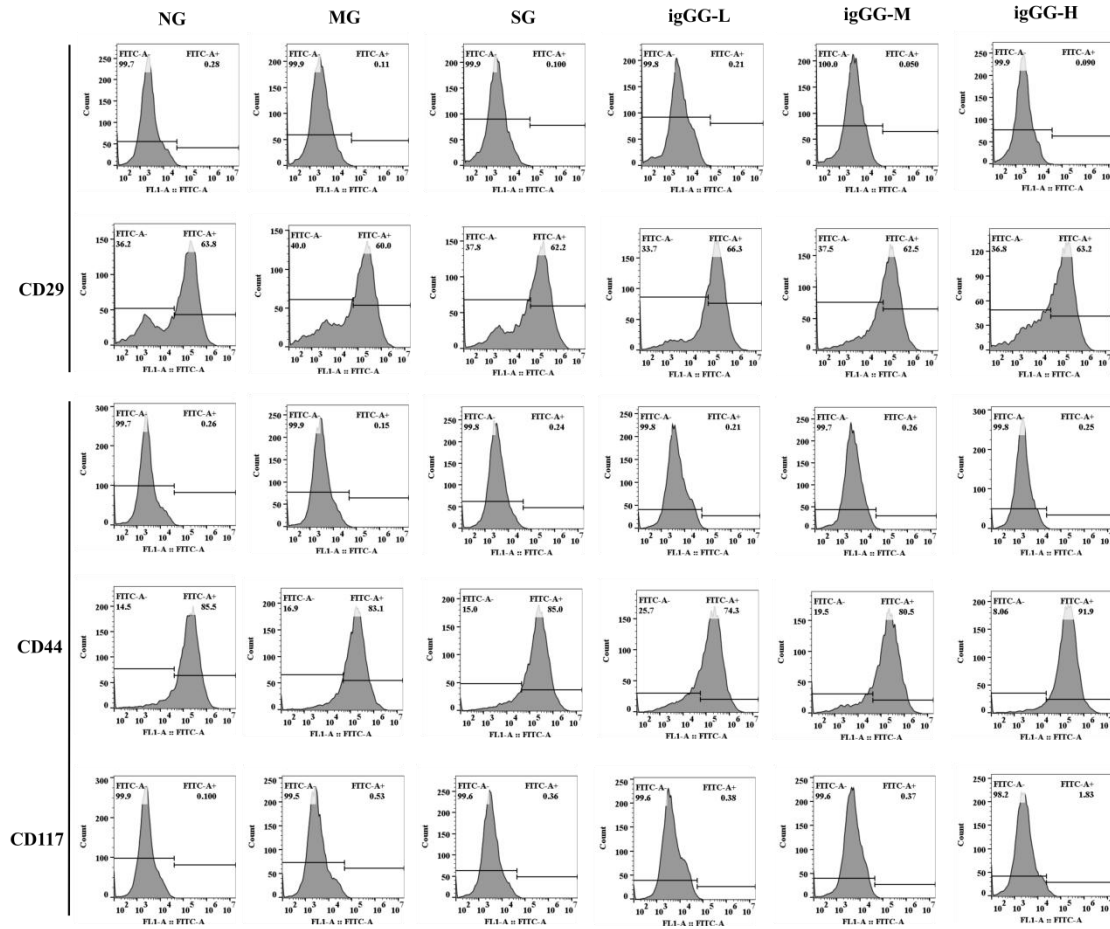

**Supplementary Figure 6.** The expression of molecular markers on the surface of BMSCs isolated from mice in each groups was detected using flow cytometry. NG, normal group; MG, model group (*D*-gal-caused aging mice); SG, solvent group (*D*-gal-caused aging mice treated with 0.1% DMSO via intragastric administration); igGG-L, *in vivo* low-dose GA-D treatment group; igGG-M, *in vivo* medium-dose GA-D treatment group; igGG-H, *in vivo* high-dose GA-D treatment group.

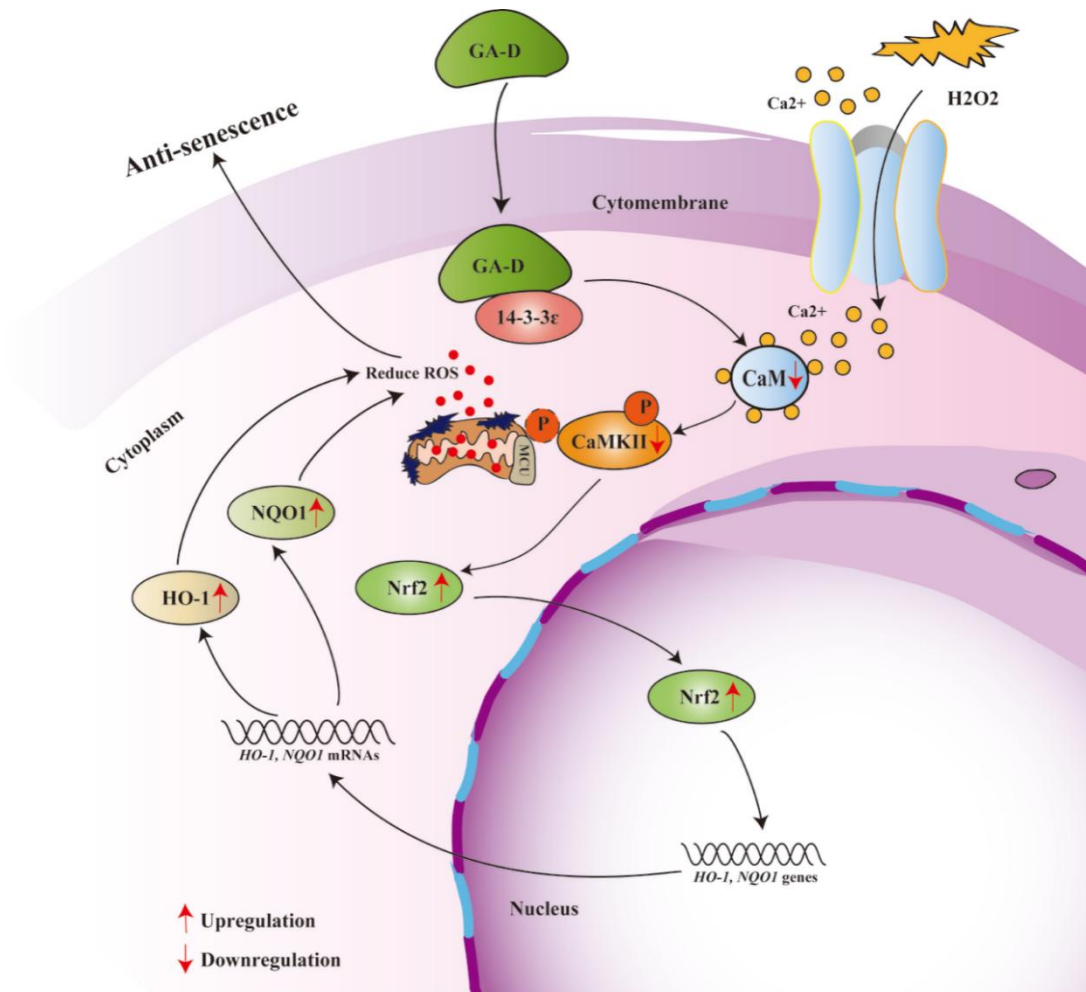

**Supplementary Figure 7.** A schematic diagram showing the proposed anti-senescence mechanism of GA-D in hAMSCs. Here GA-D downregulates CaM and phosphorylated CaMKII through targeting the 14-3-3ε isoform, which maintains calcium homeostasis and promotes intranuclear transfer of Nrf2, as well as HO-1 and NQO1 expression, which in turn inhibits ROS formation to finally prevent hAMSC senescence. *P*, phosphorylation; 14-3-3ε, 14-3-3 epsilon; CaM, Calmodulin; CaMKII, Ca<sup>2+</sup>/calmodulin dependent protein kinase II; Nrf2, Nuclear Factor erythroid 2-Related Factor 2; HO-1, hemeoxygenase-1; NQO1, NAD(P)H: quinoneoxidoreductase; ROS, Reactive oxygen species.
